# Supplementary material
Source: PubMed Central journal article supplement (PMC3035872)
Supplement: NIHMS32183-supplement-supp_mat.pdf [file NIHMS32183-supplement-supp_mat.pdf]

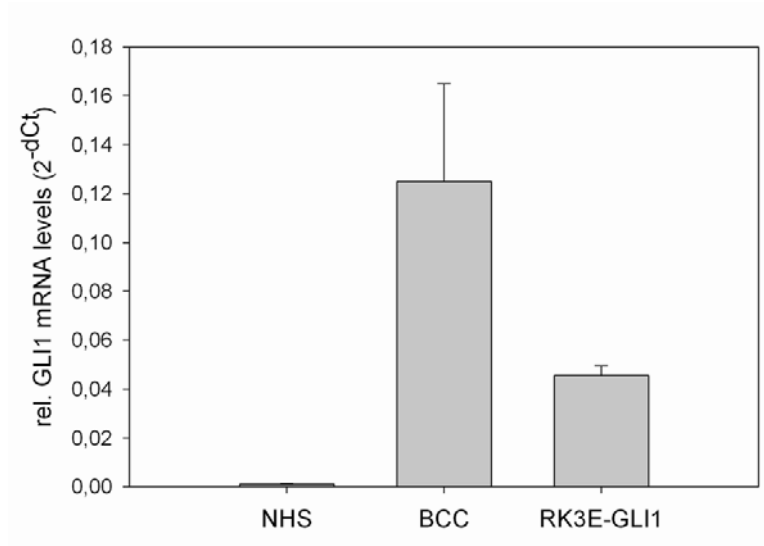

**Figure S1**

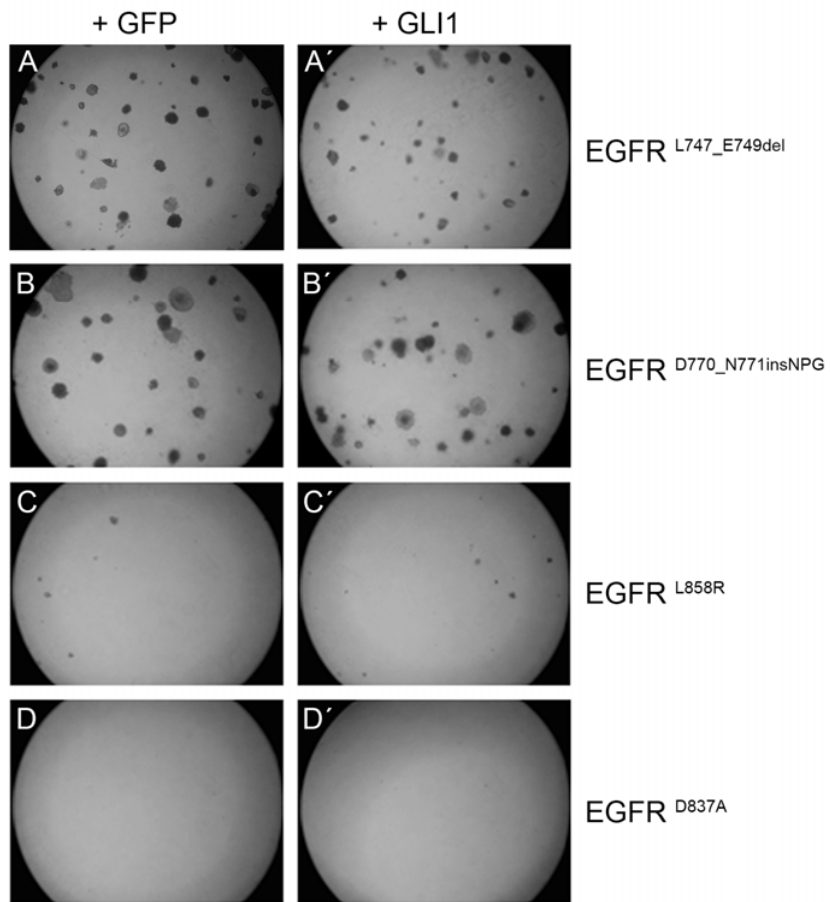

**Figure S2**

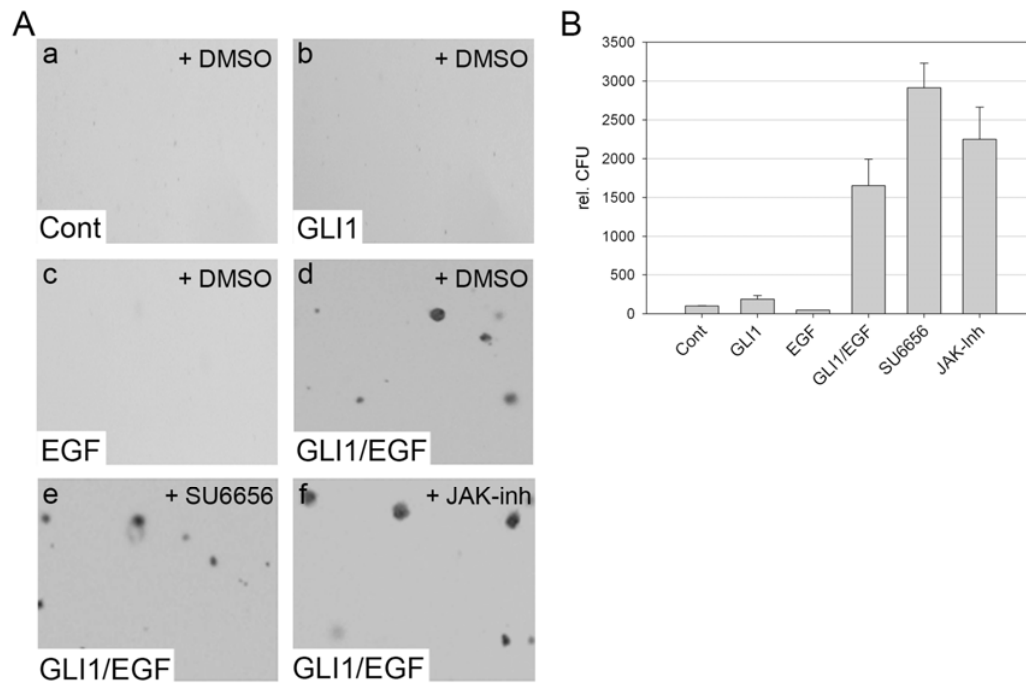

**Figure S3**

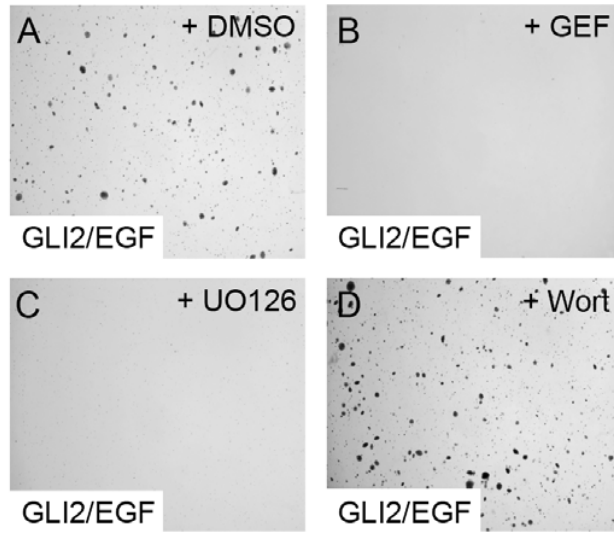

**Figure S4**

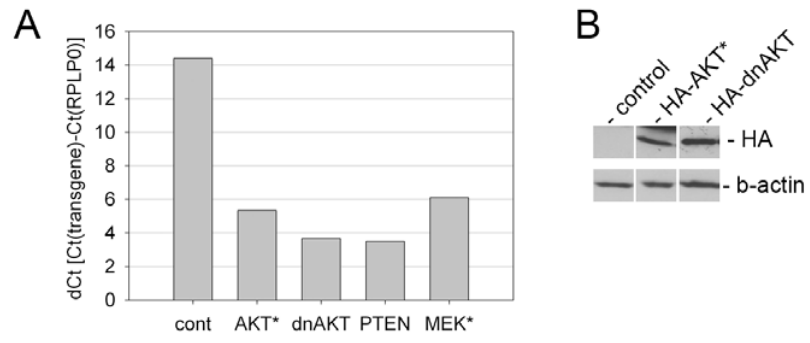

**Figure S5**

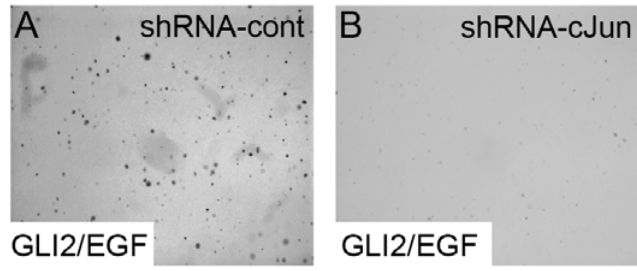

**Figure S6**

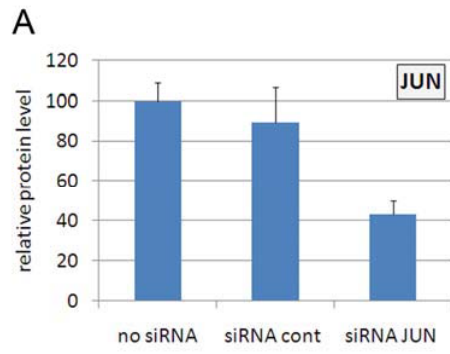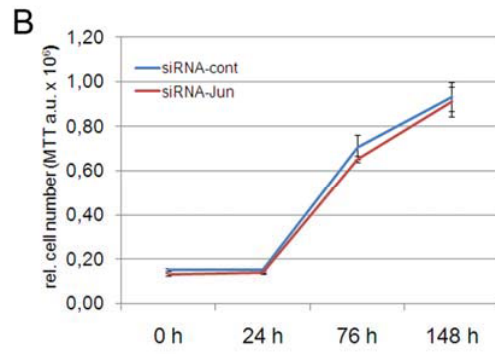

**Figure S7**

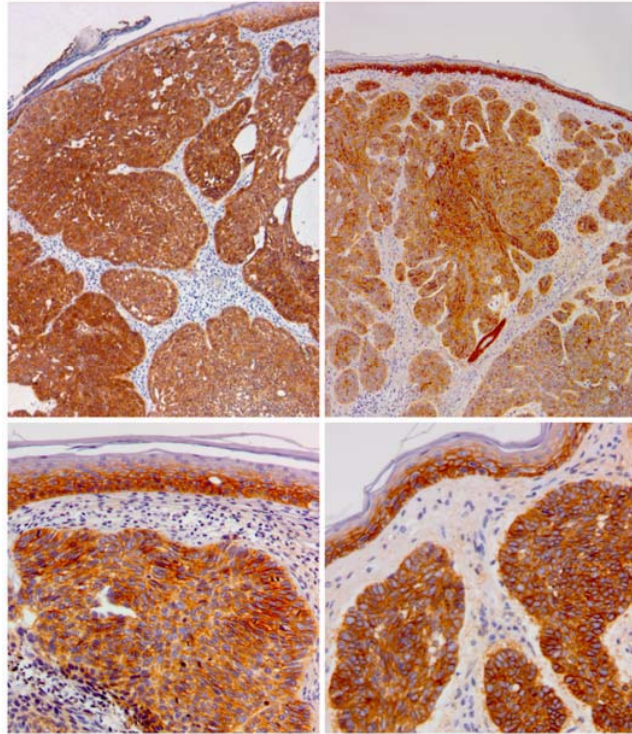

**Figure S8**



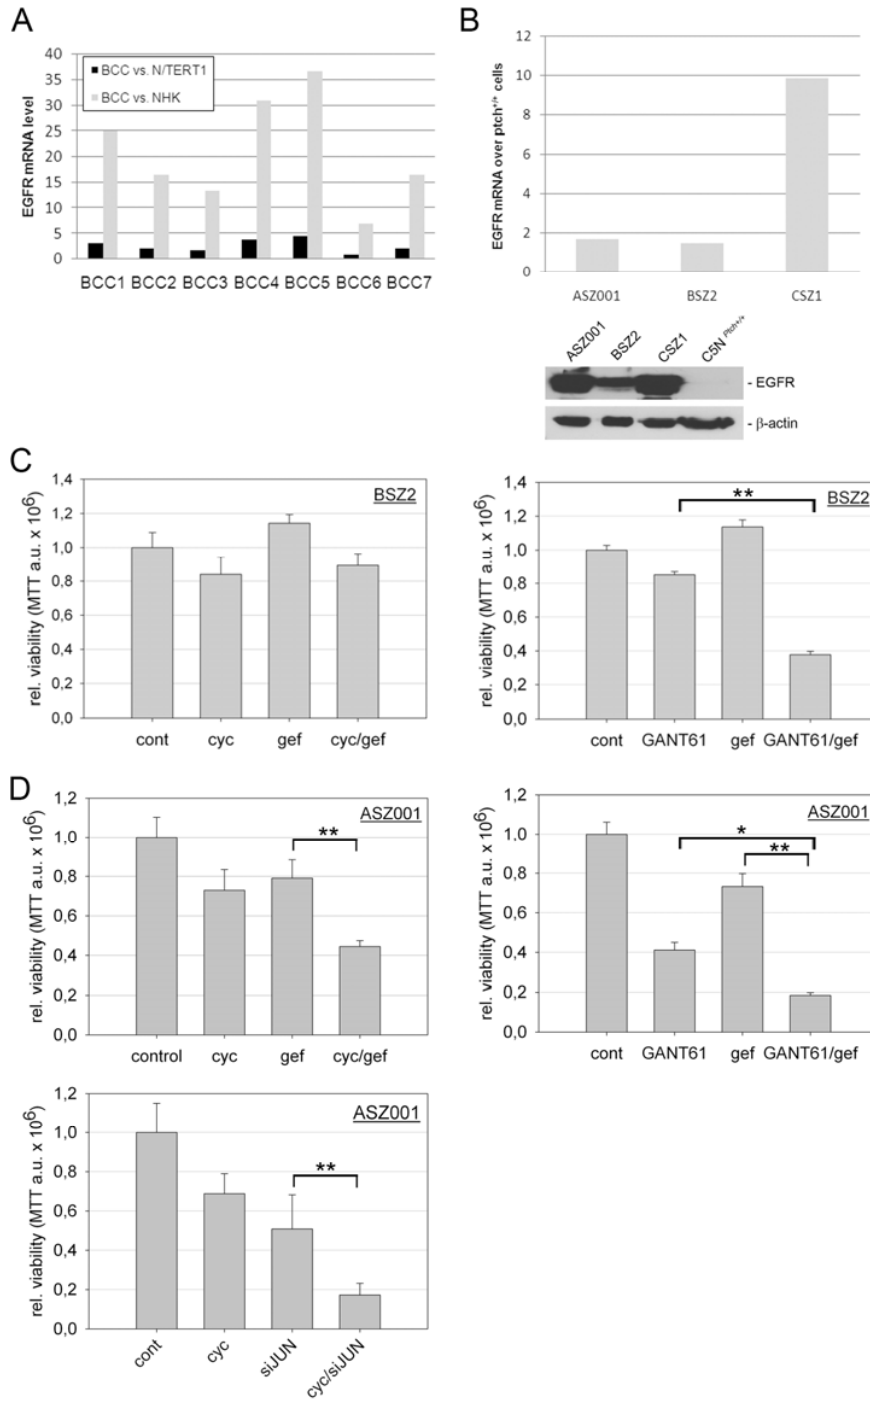

**Figure S9**

**Table I: GLI and AP-1 binding sites in promoters of EGF-independent and dependent GLI target genes**

| GENE   | GLI binding site<br>(Reference) | AP-1 binding site | position rel. to TSS | Reference                                      |
|--------|---------------------------------|-------------------|----------------------|------------------------------------------------|
| BCL2   | Regl et al. (2004)              | neg.              | --                   |                                                |
| PTCH   | Agren et al. (2004)             | neg.              | --                   |                                                |
| IL1R2  | Kasper et al. (2006)            | tgactca           | -1362                | predicted                                      |
| S100A9 | Kasper et al. (2006)            | tgactca           | -2577                | predicted                                      |
| JAG2   | Kasper et al. (2006)            | tgactca           | -4466                | predicted                                      |
| CCND1  | Kasper et al. (2006)            | tgactca/tgaggtaa  | -954/-52             | Albanese et al., 1995;<br>Herber et al., 1994; |

**References:**

Agren M, Kogerman P, Kleman MI, Wessling M, Toftgard R (2004) Expression of the PTCH1 tumor suppressor gene is regulated by alternative promoters and a single functional Gli-binding site. *Gene* **330**: 101-114

Albanese C, Johnson J, Watanabe G, Eklund N, Vu D, Arnold A, Pestell RG (1995) Transforming p21ras mutants and c-Ets-2 activate the cyclin D1 promoter through distinguishable regions. *J Biol Chem* **270**(40): 23589-23597

Herber B, Truss M, Beato M, Muller R (1994) Inducible regulatory elements in the human cyclin D1 promoter. *Oncogene* **9**(4): 1295-1304

Kasper M, Schnidar H, Neill GW, Hanneder M, Klingler S, Blaas L, Schmid C, Hauser-Kronberger C, Regl G, Philpott MP, Aberger F (2006) Selective modulation of Hedgehog/GLI target gene expression by epidermal growth factor signaling in human keratinocytes. *Mol Cell Biol* **26**(16): 6283-6298.

Table S2: EGFR protein expression in BCC

| BCC ID | EGFR | BCC subtype  |
|--------|------|--------------|
| 1      | ++   | nodular      |
| 2      | +    | nodular      |
| 3      | +++  | infiltrating |
| 4      | ++   | infiltrating |
| 5      | +++  | nodular      |
| 6      | +    | nodular      |
| 7      | ++   | nodular      |
| 8      | +++  | nodular      |
| 9      | +    | nodular      |
| 10     | +++  | nodular      |
| 11     | ++   | nodular      |
| 12     | +++  | nodular      |
| 13     | ++   | nodular      |
| 14     | +    | nodular      |
| 15     | +++  | nodular      |
| 16     | ++   | nodular      |
| 17     | ++   | nodular      |
| 18     | +    | nodular      |
| 19     | +++  | nodular      |
| 20     | ++   | nodular      |

- absent  
+ weak (lower signal than in normal epidermis)  
++ moderate (signal comparable to level in normal epidermis)  
+++ high (stronger signal than in normal epidermis)

**Supplementary figure S1:** Relative mRNA expression levels of human GLI1 in normal human skin (NHS), BCC and transduced RKE3 cells (RK3E-GLI1).

**Supplementary figure S2:** STAT3/5 and AKT dependent oncogenic EGFR variants EGFR<sup>L747\_E749del</sup> and EGFR<sup>D770\_N771insNPG</sup> and to a lesser extent EGFR<sup>L858R</sup> induce transformation but do not synergize with GLI1 in RK3E cells. The kinase-dead mutant EGFR<sup>D837A</sup> was used as negative control. Following transduction with the indicated EGFR variants, cells were subsequently transduced with GFP (+GFP, A-D)) or GLI1 (+GLI1, A'-D') expressing retrovirus.

**Supplementary figure S3:** (A) Pharmacological blockade of SRC (e) and JAK (f) function by SU6656 and JAK inhibitor I (JAK-inh) treatment, respectively, does not affect transformation in response to combined EGFR and GLI activation. (B) Quantitative analysis of soft agar cultures shown in (a-f).

**Supplementary figure S4: Anchorage-independent growth of doxycycline-inducible GLI2 HaCaT keratinocytes by integration of EGFR and GLI2 activity.** (A) Anchorage-independent growth in response to combined EGFR/GLI2 activation. Inhibition of EGFR function by gefitinib (GEF) (B) or MEK1/2 function by UO126 treatment (C) dramatically reduces colony growth in soft agar induced by concurrent EGFR and GLI2 activation, while inhibition of PI3K/AKT function by wortmannin treatment (+ Wort) had no effect (D). A dominant active form of GLI2 lacking part of the N-terminus was expressed by addition of doxycycline to the culture.

**Supplementary figure S5:** (A) qPCR analysis of cells transduced with dominant active AKT\*, dominant negative AKT (dnAKT), PTEN or dominant active MEK (MEK\*) expression constructs; note that the smaller the value the higher the expression is. Expression of RPLP0 was used as reference control. (B) Western blot showing efficient expression of HA-tagged AKT\* and dnAKT\* constructs used in Figure 4A-D.

**Supplementary figure S6: siRNA knock-down of JUN abolishes anchorage-independent growth induced by concurrent activation of EGFR and GLI2 expression.** Soft agar assays of doxycycline-inducible GLI2 expressing HaCaT keratinocytes treated with EGF (GLI2/EGF) and expressing non-specific control shRNA (shRNA-cont) (A) or JUN-specific shRNA (shRNA-cJun) (B). A dominant active form of GLI2 lacking part of the N-terminus was used. Stable knock-down was achieved by retroviral expression of JUN shRNA.

**Supplementary figure S7: stable siRNA knock-down of JUN does not affect HaCaT keratinocyte proliferation in vitro.** (A) Quantitative analysis of JUN protein expression in response to control (siRNA cont) or JUN specific siRNA (siRNA JUN). Stable knock-down was achieved by retroviral expression of respective shRNA constructs. (B) Growth curve of HaCaT keratinocytes stably expressing control (siRNA-cont) or JUN siRNA (siRNA-Jun).

**Supplementary figure S8:** Representative BCC stainings showing specific expression of EGFR in the tumor islands and adjacent non-lesional epidermis.

**Supplementary figure S9:** (A) qPCR analysis of EGFR mRNA expression in seven BCC samples (BCC1-BCC7) compared to EGFR mRNA expression in N/TERT1 or normal human keratinocytes (NHK). (B) qPCR analysis of EGFR mRNA (upper panel) and EGFR protein expression (lower panel) in mouse BCC cell lines ASZ001, BSZ2, CSZ1 compared to EGFR expression in patched <sup>+/+</sup> C5N keratinocytes. (C-D) Single or combined treatment of BSZ2 (C) or ASZ001 cells (D) with cyclopamine and gefitinib, GANT61 and gefitinib, or cyclopamine and JUN shRNA (siJUN), respectively; cyc: cyclopamine, gef: gefitinib. Statistical significance was determined by Student's t-test. \*  $p < 0.05$ , \*\*  $p < 0.02$ ;
